1 **Mapping and Analysis of QTL for Early Maturity Trait in Tetraploid Potato (*Solanum tuberosum* L.)**

2

3 Xingcui Li · Jianfei Xu · Shaoguang Duan · Jiaojiao Zhang · Chunsong Bian · Jun Hu ·Guangcun Li\* ·Liping

4 Jin\*

5

6 Institute of Vegetables and Flowers, Chinese Academy of Agricultural Sciences / Key Laboratory of Biology and  
7 Genetic Improvement of Tuber and Root Crop, Ministry of Agriculture and Rural Affairs, P.R.C., Beijing 100081,  
8 China

9

10 \*Corresponding author

11 Name: Liping Jin

12 Address: Institute of Vegetables and Flowers, Chinese Academy of Agricultural Sciences

13 100081 Beijing, China

14 Tel: 86-10-82109543 Fax: 86-10-62174123

15 E-mail: jinliping@caas.cn

16 **Abstract**

17 Maturity is one of the important traits of potato. In order to get the genetic segment of potato early maturity trait,  
18 a tetraploid potato maturity segregation population of Zhongshu 19 × Zhongshu 3 was used for genetic analysis  
19 through the combination of high throughput simplified genome sequencing (2b-RAD) and bulked segregation  
20 analysis (BSA). A genetic segment related to the early maturity trait at the 3.7~4.2 Mb locus on the short arm of  
21 chromosome 5 was obtained and eight markers were developed based on this segment, while five of them were  
22 closely linked to the early maturity trait loci. Moreover, 42 SSR markers were developed based on the reference  
23 sequence of DM. Finally, a genetic map of chromosome 5 contained 50 markers was constructed using the  
24 Tetraploidmap software. The total map length was 172 cM with an average genetic distance of 3.44 cM.  
25 Combining with phenotypic data of the segregation population, we mapped the early maturity trait QTL with the  
26 contribution of 33.55% on the short arm of chromosome 5, located at 84cM between the flanking markers  
27 SSR5-85-1 and SCAR5-8 with the physical interval of 471kb. Gene annotation showed that there exist 34 genes  
28 in this region, 12 of them are unknown function. Among the other 22 annotated genes, E3 ubiquitin ligase gene  
29 *PUB14* may be related to maturity and regulate tuber formation. Our fine mapping of the early maturity QTL  
30 made a solid foundation for cloning of the early maturity controlled gene or genes.

31 **Key words:** potato · genetic segment · early maturity trait · marker development · QTL mapping

32

33 **Author contribution statement**

34 GL and LJ conceived the project, provided idea and designed the whole experiments; XL and JZ conceived the  
35 project and performed the molecular marker development and analysis; JX contributed to the maturity  
36 phenotyping of the mapping population; SD performed the parents crossing of the mapping population; CB and  
37 JH performed the field management of potato materials. All authors read and approved the final manuscript.

38 **Key message**

39 Early maturity site was mapped using a tetraploid potato segregation population derived from cv. Zhongshu 19  
40 and Zhongshu 3. One major QTL with 33.55% contribution to early maturity was fine mapped in physical  
41 interval of 471kb on chromosome 5.

42

43

44

45

46

47

48

49

50

51

52

53

54

55

56

57

58

59

60

61

## 62 Introduction

63 Potato (*Solanum tuberosum* L.) is the third largest food crop worldwide and also serves as an important  
64 industrial raw material. Maturity is one of the important features for identifying the characteristics of potato  
65 varieties. It is also an important agronomic trait and a major breeding target. Different maturity varieties can  
66 meet the production and consumption demand in different regions and seasons. The breeding of different  
67 maturity varieties is greatly significant in the development of the potato industry. Previous studies showed that  
68 potato maturity traits were controlled by minor polygenes and were recessive, and the potato maturity  
69 quantitative trait loci (QTLs) were distributed on 12 chromosomes of potato. However, most of the studies have  
70 mapped the major QTL for maturity on chromosome 5 and linked to the QTL for resistance to late blight (Van  
71 Eck et al. 1995; Collins et al. 1999; Oberhagemann et al. 1999; Ewing et al. 2000; Draffehn et al. 2013). In 2007,  
72 Sliwka et al. (2007) used a diploid potato population to map a QTL associated with growth stages and closely  
73 linked to molecular marker BA47f2t7 (P1) on chromosome 5 (Sliwka et al. 2007). Later, scientist found that the  
74 major QTLs that control maturity on chromosome 5 were closely related to the QTLs controlling late blight  
75 resistance but were independent of each other and closely linked to molecular marker GP21 (Danan et al. 2011).  
76 Using tetraploid materials, a major QTL was also obtained to be associated with maturity on chromosome 5,  
77 which showed a contribution rate of 54.7% (Bradshaw et al. 2004). Later, by increasing the number of progeny  
78 populations, some minor QTLs with contribution rates between 5.4% and 16.5% were identified (Bradshaw et al.  
79 2008). In recent years, a large number of single nucleotide polymorphisms (SNPs) have been developed, and a  
80 high-density genetic linkage map containing 3,839 SNPs has been constructed by analyzing dose information of  
81 SNPs in tetraploid potato. One QTL associated with maturity closely linked to molecular marker c2\_476095 has  
82 also been mapped on chromosome 5, with a contributing rate of 55% (Hackett et al. 2014). In 2013,  
83 Kloosterman et al. (2013) through fine mapping cloned the *StCDF1.2* gene related to potato maturity near  
84 molecular marker GP21 on the short-arm of chromosome 5. This gene belongs to the DNA-binding One Zinc  
85 Finger transcription factor family, which involves in tuber formation as an intermediate regulatory factor in the  
86 potato tuber induction pathway.

87 Tetraploid potato ( $2n = 4x = 48$ ) is highly heterozygous, with high frequency of genetic recombination and  
88 severe recession after self-fertilization (Manrique-Carpintero et al. 2018). The molecular marker is difficult to  
89 develop. The diploid potato chromosome number is small, the genetic background is relatively simple, and it is  
90 easy to carry out genetic analysis and operation. Therefore, the development of potato markers and genetic map  
91 construction is mainly at the diploid level, and is done mainly with the use of the traditional QTL mapping  
92 analysis method, whereas fewer studies are conducted on tetraploid materials. Although most of the studies have  
93 mapped QTLs on chromosome 5, there are no more genes related to potato physiology maturity are cloned  
94 except for *StCDF1.2* gene.

95 With the development of high-throughput sequencing technology, marker development and genetic segment  
96 mining in complex genomic species becomes simple. The high-throughput simplified genome sequencing  
97 2b-RAD technique uses DNA type II B restriction endonucleases (*BsaXI* and *AlfI*) to cleave DNA from the  
98 upstream and downstream sites of the target site on genomic DNA to obtain DNA fragments of consistent length  
99 (tags). The 2b-RAD technique avoids the process of fragment size selection in other genome-wide sequencing

100 technologies, making tags more uniform in the genome, allowing for the development of the complex genomic  
101 marker, mining of chromosomal segments, and construction of linkage map and genetic variation map in natural  
102 populations (Wang et al. 2012). At present, this technique has been applied to construct high-density genetic  
103 linkage maps of animals, plants, and marine organisms. The high-density genetic linkage map of *Chlamys farreri*  
104 includes 3,806 molecular markers, the average distance between markers is 0.41 cM with genome coverage of  
105 99.5%, and is it mapped to growth-and-sex-related QTLs (Jiao et al. 2013, 2014).

106 In this study, we intend to use the tetraploid potato maturity segregation population, combine  
107 high-throughput simplified genome sequencing 2b-RAD with the BSA method, to identify the genetic segment  
108 related to the early maturity trait and develop molecular markers based on the genetic segment. Linkage Map  
109 was constructed by using software TetraploidMap for Windows (Hackett et al. 2007), which was designed  
110 for calculating linkage maps from the maker phenotypes of the parents and segregating progeny of a cross  
111 in an autotetraploid species. Combined with 4 years foliage maturity phenotypic data, QTL analysis was  
112 performed using this software, which will provide a foundation for cloning and functional verification of the  
113 maturity gene or genes.

## 114 **Materials and methods**

### 115 **Plant materials**

116 The mapping population, consisted of 221 individuals, was from a cross between two tetraploid varieties:  
117 ‘Zhongshu19’ × ‘Zhongshu 3’. The female parent ‘Zhongshu 19’ with a pedigree of (CIP92.187 × CIP93.154)  
118 × (Bierma × Colmo) is a late maturing variety with a growth period of 110 days after emergence, and the male  
119 parent ‘Zhongshu 3’ with a pedigree of (Jingfeng 1 × BF77A) is an early maturing variety with a growth period  
120 of 75 days. They were bred by the Institute of Vegetables and Flowers, Chinese Academy of Agricultural  
121 Sciences, Beijing.

### 122 **Field tests**

123 During four consecutive years (2014-2017), the field experiment was carried out in Zhangbei (ZB) County of  
124 Hebei Province (41°15' N, 114°07' E, 1500 m a.s.l.) and Liaocheng(LC) City of Shandong Province (36°45' N,  
125 115°97' E, 38 m a.s.l.) in China. The mean daily temperature ranged from 10.05 °C to 21.66 °C and 12.59 °C to  
126 24.37 °C corresponding to the average minimum and maximum temperatures. The average sunshine duration is  
127 8.54 h and 6.45 h respectively. Four tubers of each progeny were sown in early May and mid-March and  
128 harvested in late September and late June in ZB and LC respectively in each year.

### 129 **Phenotypic identification**

130 Growth period was defined the time from emergence (seedling emergence) to physiological maturation (50% of  
131 plant leaves appear yellow) in this study. Individual emergence was investigated every five days from 20 days  
132 after sowing. Physiological maturation time of the individuals was investigated every five days from 60 days  
133 after emergence (DAE), continued to investigate every five days, and finally calculated the growth period of  
134 each individual.

135 The maturity of the F1 population was divided into five groups according to the growth period, and scored from  
136 one to five scales. 1: very early mature type with a growth period less than 70 DAE; 2: early mature type with a

137 growth period 71-80 DAE; 3: middle mature type with a growth period 81-100 DAE; 4: late maturity type with  
138 a growth period 101 -110 DAE; 5: very late mature type with a growth period more than 110 DAE.

### 139 **DNA extraction and progeny mixed pool construction**

140 Two-hundred twenty-one samples were collected from young leaves of Zhongshu 3, Zhongshu 19, and F1 plants.  
141 The genomic DNA was extracted by the CTAB method, and DNA quality was detected with 1% agarose gel and  
142 BioDrop for marker development and validation.

143 We used a punch to take one young leaf from the same part of each F1 generation early and late maturing  
144 material with a growth period of less than 70 DAE and greater than 110 DAE, respectively, mixed them in equal  
145 amount, extracted their DNA, and constructed an early and late maturing mixed DNA pool for simplified  
146 genome sequencing. The DNA extraction method and quality testing method are the same as mentioned above.

### 147 **Simplified genome sequencing analysis and marker development**

148 A high-throughput simplified genomic 2b-RAD sequencing technique was used to construct a tag sequencing  
149 library of parental DNA and extreme progeny DNA pool. The single-terminal sequencing was performed on the  
150 Hiseq 2500 v2 platform. After removing from original reads of the sequences that contain no *BsaXI* recognition  
151 sites, low quality sequences and sequences with more than 10 consecutive identical bases, the individual high  
152 quality reads were mapped to the potato DM reference sequence using SOAP software. The number and depth  
153 of specific tags that can be used for typing were obtained, and genome-wide SNP screening and typing was  
154 conducted. According to the classification results, we constructed a chromosome tag density distribution map of  
155 four samples with Matlab software, further, constructed specific tag density distribution and absolute value  
156 distribution of the specific tag density between the two mixed pools, respectively, and then screened out  
157 chromosome segments with a large difference in tag densities.

158 Based on the tag information obtained in the different segments, the synthetic primers were designed  
159 according to the genomic sequences on the potato genome sequence website  
160 (<http://solanaceae.plantbiology.msu.edu/cgi-bin/gbrowse/potato/>). The quality and specificity of the primers  
161 were detected by using the genomic DNAs of the late maturing parent Zhongshu 19 and early maturing parent  
162 Zhongshu 3 as the templates. The amplified products were detected by agarose gel electrophoresis with a  
163 concentration of 1.2%. The PCR reaction system consisted of: 5.6  $\mu\text{L}$  ddH<sub>2</sub>O, 1.0  $\mu\text{L}$  buffer (10  $\times$  PCR), 0.8  $\mu\text{L}$   
164 dNTPs (10 mmol L<sup>-1</sup>), 0.2  $\mu\text{L}$  forward primer (10  $\mu\text{mol}$  L<sup>-1</sup>), 0.2  $\mu\text{L}$  reverse primer (10  $\mu\text{mol}$  L<sup>-1</sup>), 0.2  $\mu\text{L}$  Taq  
165 enzyme (2.5 U  $\mu\text{L}^{-1}$ ), and 2  $\mu\text{L}$  DNA (25 ng  $\mu\text{L}^{-1}$ ). PCR was performed as follows: 94°C for 3 min, followed by  
166 35 cycles of 94°C for 30 s, 59°C for 30 s, and 72°C for 50 s, and finally, 72°C for 10 min.

167 The PCR products were digested by *BsaXI* restriction endonuclease if the primers could amplify clear and  
168 non-different bands in the parents (Zhongshu 3 and Zhongshu 19). The enzyme digestion system was 8  $\mu\text{L}$  PCR  
169 product, 1.5  $\mu\text{L}$  CutSmart® buffer, 0.2  $\mu\text{L}$  *BsaXI* endonuclease (0.5  $\mu\text{L}/\text{U}$ ), and 5.3  $\mu\text{L}$  ddH<sub>2</sub>O. The primers  
170 whose PCR products can be digested only in one parent and not digested in the other parent were used to  
171 develop CAPs markers. The primers that amplified a band in one parent but not in the other parent, or amplified  
172 different size bands in the two parents, were used to develop SCAR markers. Finally, the progeny early and late  
173 maturing materials were used for validation.

## 174 **Genetic map construction and QTL mapping**

175 Polymorphism screening of the molecular markers developed in this study and the previously published 152  
176 SSR markers on chromosome 5, was conducted using the genomic DNAs of Zhongshu 3, Zhongshu 19, and 16  
177 F1 generation materials as the templates (Feingold et al. 2005; Ghislain et al. 2009; Zhou, 2014), and the  
178 selected polymorphic markers were verified using the population of 221 progenies. According to the  
179 requirement of tetraploid mapping software TetraploidMap (Hackett et al. 2007), we selected the following  
180 types of makers for map construction: (1) simplex dominant markers (segregating 1:1) with a  $p$  value greater  
181 than 0.001 from a Chi-square test for goodness of fit; (2) duplex dominant makers (segregating 5:1) with a  $p$   
182 value greater than 0.01; (3) double-simplex dominant makers (segregating 3:1) with a  $p$  value generally greater  
183 than 0.01 and which were known to be linked to at least one simplex marker; While dominant makers present in  
184 both parents are extremely uninformative about recombination unless the segregation ratio is 3:1.(Hackett at al.  
185 2007). So makers with the segregation ratio is 11:1 (simplex  $\times$  duplex), were in fact omitted from the linkage  
186 map. Because of all makers we chose all from chromosome 5, so most of makers were selected to construct  
187 linkage map for chromosome 5, except for a few makers that may belong different linkage group since add them  
188 the software would show an error in subsequent QTL analysis. After the makers are selected, the TetraploidMap  
189 ordered them for proper sequence and then we assigned 50 makers to four homologous chromosomes  
190 considering with the relationship between makers is couple or repulsive (Simonsen and McIntyre. 2004). The  
191 primer information for makers in this research are listed in Table 1. And genotypes information for 221  
192 progenies are listed in Table S1. Consequently, combination with the mean value of 4 years progeny phenotype  
193 data, details see Table S2. the maturity QTL was mapped by using TetraploidMap.

## 194 **Data availability**

195 The authors state that all data necessary for confirming the conclusions presented in the manuscript are  
196 represented fully within the manuscript and supplemental information at  
197 Figshare: <https://figshare.com/s/876e1539f3f42b8ec8ef> . TetraploidMap for Windows is freely available at:  
198 <http://www.bioss.ac.uk/> (user-friendly software).

## 199 **Results**

### 200 **Distribution of the segregation population maturity**

201 In ZB, the materials were planted on 20<sup>th</sup> May and emerged in mid-June. Part of the genotypes reached  
202 physiological maturity in late August, while others were still keep vigorous in late September. In LC, the  
203 corresponding date above were 10<sup>th</sup> March, mid-April and late June respectively. According to the field  
204 investigation in the four consecutive years, the statistical analysis of the population for maturity trait was  
205 consistent with polygenic genetic characteristic of quantitative traits. The offspring showed a normal distribution  
206 over the entire scoring range (Fig. 1). Detail phenotypic data among four years was shown in Table S1. Genomic  
207 DNA was extracted from 35 very early and early maturing genotypes and 33 very late maturing genotypes, and  
208 the corresponding early maturing DNA pool and late maturing DNA pool were constructed.

### 209 **Screening and marker development of early maturity traits**

210 Simplified genome sequencing on four samples of parents Zhongshu 3 and Zhongshu 19, the early maturing  
211 pool, and the late maturing pool were carried out using the 2b-RAD technique, and a total of 52,714,218 reads

212 were obtained. The average number of reads of each sample was 13,178,554 with an average sequencing depth  
213 of 42× (Table 2). High-quality reads containing *BsaXI* digestion sites in the four sequencing libraries were all  
214 higher than 90%, and finally 125,556 unique tags in average of each sample were obtained.

215 SNP marker typing was performed according to the obtained sequencing tag sequences and the tag  
216 distribution and density profiles on 12 potato chromosomes were got, and the results showed that the tags were  
217 evenly distributed on all 12 potato chromosomes, and there was no large-scale tag information missing (Fig. 2).  
218 Furthermore, according to the specific tag density of early maturing and late maturing pools, the density  
219 difference map of the specific tag between early maturing and late maturing pools was obtained, and the results  
220 showed that the segments with a large difference in tag density between early and late maturing pools were  
221 mainly concentrated on chromosomes 4 and 5, where in the segment with the most significant difference in tag  
222 density was found at 3.68–6.19 Mb on chromosome 5, followed by 18.6–20.9 Mb and 27.4–30.3 Mb on  
223 chromosome 4 (Fig. 3). Moreover, the specific tag density of the early maturing pool among the differential  
224 segments of chromosome 5 was relatively high, suggesting that this segment may be related to the early  
225 maturity trait. But all the specific tag densities of the late maturing pool were relatively high among the  
226 differential segments of chromosome 4, which might be related to the late maturity trait (Fig. 3).

227 Based on the above specific tag positions of chromosomal differential segments, combined with potato  
228 reference genomic sequences, a total of 92 primers were designed with 52 pairs of primers in the 3.68–6.19 Mb  
229 region of chromosome 5 and 40 pairs of primers in the differential segments of chromosome 4. Twenty  
230 polymorphic markers including 4 CAPS and 4 SCAR markers located on chromosome 5 were obtained from 92  
231 designed primers. Further test on the F1 individual plants showed that only five markers of SCAR5-5, SCAR5-8,  
232 CAPS5-3-2, CAPS5-21-2 and CAPS5-24 were closely linked to the early maturity trait. Polymorphic markers  
233 on other chromosomes were not linked with maturity trait (data not shown), suggesting that only the genetic  
234 segment on chromosome 5 was associated with the early maturity trait. The marker SCAR5-8 on chromosome 5  
235 was used to validate 70 early and late maturing Chinese cultivars, and the results showed that the coincidence  
236 rate of marker detection results and trait identification results was as high as 81.4% (Li et al., 2017), indicating  
237 that this marker could be applied in potato molecular marker-assisted breeding.

### 238 **QTL mapping for early maturity trait**

239 In order to verify the accuracy of genetic segments for the early maturity trait that were mined, we constructed a  
240 genetic linkage map of chromosome 5 and performed QTL mapping for the early maturity trait. First, early and  
241 late maturing parents and their 16 progenies were used to test the polymorphism of the 152 pairs of SSR primers  
242 on chromosome 5, and a total of 32 polymorphic SSR markers were obtained. Then the 32 polymorphic SSR  
243 markers and the previous eight molecular markers (4 CAPS, 4 SCAR markers) developed on chromosome 5  
244 were further used to test the F1 generation. In this study, we focused on early maturity, and the genetic linkage  
245 map for early type parent ‘zhongshu 3’ was constructed (Fig 4). The map including a total of 50 makers, of  
246 which 33 were simplex, 4 were duplex, and 13 were double simplex makers (TetraploidMap generate  
247 automatically combined with the segregation ratio) (Table 3). The total length of the map coverage was 172 cM,  
248 and the average distance between markers was 3.44 cM. The 50 markers of this map were four CAPS markers,  
249 four SCAR markers, and 42 SSR markers, respectively. 42 SSR markers were consisted of 25 single markers



250 and 17 polymorphic SSR markers. The 25 single markers were come from the division of 11 polymorphic SSR  
251 markers, and they were SSR5-22-1, SSR5-22-2, SSR5-36-1, SSR5-36-2, SSR5-38-1, SSR5-38-2, SSR5-40-1,  
252 SSR5-40-2, SSR5-40-3, SSR5-55-1, SSR5-55-2, SSR5-85-1, SSR5-85-2, SSR5-85-3, SSR5-85-4, SSR5-100-1,  
253 SSR5-100-2, SSR5-103-3, SSR5- 103-4, PM0333-2, PM0333-3, STI049-2, STI049-3, STG0021-1, and  
254 STG0021-2. Actually, among the 32 polymorphic SSR markers only 28 markers were used to construct the  
255 genetic linkage map.

256 QTLs for foliage maturity type were identified using TetraploidMap. Initially, the significance of individual  
257 markers for each year trait was tested by analysis of variance (ANOVA) and the analysis procedure  
258 Kruskal-Wallis in TetraploidMap. This two tests were used to compare the differences of the mean value of  
259 different makers genotype (Simonsen and McIntyre, 2004) . A P-value of less than 0.01 was used as a threshold  
260 criterion for QTL detection. Results from above two tests suggested the existence of QTLs for foliage mature  
261 type on chromosome 5. There are 22 makers on chromosome 5 may associated with maturity. The maker cluster  
262 including maker CAPS 5-21-2, CAPS5-24, CAPS5-3-2, SCAR5-5, SCAR5-8 were closely linked to the QTL  
263 locus, since not only their P value are 0.000 but also their smallest SED with 0.0937 (Table 3).

264 Furthermore, in combination with phenotypic identification data of F1 segregation population, three  
265 significant QTLs for early-maturity trait loci were identified with LOD scores above the threshold value of 2.97  
266 (The blue dotted line) located on chromosome 5 (Figure 5). The most remarkable QTL was mapped at 84 cM of  
267 the 3rd homologous chromosome of chromosome 5 between marker SSR5-85-1 and maker cluster including  
268 CAPS5-21-2, CAPS5-24, CAPS5-3-2, SCAR5-5, SCAR5-8, but more closely linked to the 5 markers, which  
269 was in line with the position of the maturity genetic segment mined in this study. The maximum LOD value of  
270 this QTL was 19.491 explaining 35.55% of the phenotypic variation. And there were other two locus may also  
271 associated with maturity type, one QTL linked to marker STM5148 with the LOD value 12.50, another one  
272 mapped at 113cM in correspondence of marker PM0263 with the LOD value nearly 11.30.

273 In conjunction with the marker locus and reference genome of the DM sequence, the QTL of early maturity  
274 trait was mapped to the 471 Kb physical interval between the flanking markers of SSR5-85-1 and SCAR5-8,  
275 which contained six molecular markers (Fig. 6). The order of all makers in this QTL region is consistent with  
276 the physical order of the makers in the potato DM genome sequence. (PGSC. Tuberosum group Phureja DM1-3  
277 Pseudomolecules (v4.03)). Gene prediction and annotation showed that there are 34 genes in this 471 Kb  
278 physical range based on the comparison with the reference genome of DM sequence,  
279 ([http://solanaceae.plantbiology.msu.edu/pgsc\\_download.shtml](http://solanaceae.plantbiology.msu.edu/pgsc_download.shtml)), of which 22 genes have been annotated and 12  
280 genes functions are unknown (Table 4). The 22 annotated genes have different physiological functions and  
281 participate in different physiological regulation pathways. For example, E3 ubiquitin ligase PUB14 is involved  
282 in the photoperiodic regulatory pathway. The auxin export carrier is involved in plant hormone transport. Heat  
283 shock protein binding, Quinolinate phosphoribosyl transferase, phosphatidylinositol kinase fyv1, resistance  
284 protein BS2, and resistance protein PSH-RGH6 are involved in plant defensive reactions. The WD repeat  
285 protein is involved in protein transport and nucleic acid processing modification. The Myb transcription factor is  
286 involved in the plant secondary metabolic regulatory pathway.

## 287 **Discussion**

### 288 **Genetic segments mining for early maturity trait based on 2b-RAD simplified genome sequencing**

289 At present, many researchers have used traditional molecular marker technologies to carry out potato QTL  
290 mapping. Most of the studies mapped maturity major genetic loci on chromosome 5 and found that other  
291 chromosomes may also have maturity micro-genetic sites. In this study, for the first time, we used the  
292 high-throughput simplified 2b-RAD sequencing technique to identify and mark genetic segments for potato  
293 complex quantitative traits, found a segment with large difference in specific tags on chromosome 4 and 5, and  
294 further tag validation showed that the genetic segment on chromosome 5 is associated with the early maturity  
295 trait, which is consistent with previous studies (Collins et al. 1999; Oberhagemann et al. 1999; Ewing et al. 2000;  
296 Bradshaw et al. 2004, 2008; Danan et al. 2011; Hackett et al. 2014).

297 Tetraploid potato has a complex genetics, and molecular marker development is difficult. Previously  
298 developed markers were mainly based on diploid (Bakker et al. 2004; Asano et al. 2012; Zhu et al. 2015;  
299 Hara-Skrzypiec et al. 2018), but markers developed directly at the tetraploid level were rarely reported. This  
300 study based on the maturity-related genetic segments mined on chromosome 5, a total of 52 pairs of specific  
301 primers were designed and synthesized, and eight molecular markers were developed with a development  
302 efficiency of 15.4%. The eight markers were further verified by early and late maturing progenies in the  
303 tetraploid segregation population, five markers were found to be closely linked to the early maturity trait.  
304 Therefore, the method can be used for the development of markers of complex genomes such as potato.  
305 Combined with published potato reference genomes, this method can greatly shorten the marker development  
306 cycle and map the markers. Which will also provide a reference for marker development of other polyploid  
307 complex genomic organisms.

308 In this study, we found that not only was there a maturity related genetic segment on chromosome 5, but there  
309 were also some segments with large difference in specific tag density on chromosome 4. Although there are a  
310 few reports that mention the existence of a maturity-related genetic segment on the chromosome 4, the tag  
311 validation results in this study showed that the genetic segment on chromosome 4 was not related to maturity.  
312 This may be due to several reasons: First of all, the tetraploid potato genome is highly heterozygous, more  
313 complicated than diploid potato in heredity, and in the high-throughput sequencing process, may be due to  
314 sequencing depth not being enough or *BsaXI* recognition sequence preferences; some information was not  
315 measured. Secondly, due to the filtering out some of the low quality reads resulted in partial loss of genetic  
316 information, and eventually the differential tag interval appears. Thirdly, when performing specific tag filtering,  
317 removing the tags with fewer occurrences may also cause a difference in tag density.

### 318 **Genetic linkage map construction and QTL mapping**

319 In this study, a 50-marker genetic linkage map was constructed using tetraploid potato segregation population,  
320 and an early maturity trait QTL was mapped at the position of 84 cM near the marker SCAR5-8 (or SCAR5-5,  
321 CAPS5-3- 2, CAPS5-24, CAPS5-21-2) on the short arm of chromosome 5. Which indicates that the QTL for the  
322 early-maturity trait obtained by genetic map mapping is consistent with the maturity genetic segment results  
323 obtained by high-throughput simplified genome sequencing, and also proved the feasibility and accuracy of  
324 high-throughput simplified genome sequencing 2b-RAD method in mining potato genetic segments for

325 important traits. The five molecular markers (SCAR5-8, SCAR5-5, CAPS5-3-2, CAPS5-24, CAPS5-21-25) that  
326 are closely linked to the early maturity trait loci are from the same genetic segment and are relatively close to  
327 each other, and no significant separations between the markers in the genetic map. Furthermore, the five  
328 molecular markers were clustered on the 3rd homologous chromosome and belonged to the same linkage group.  
329 The other three molecular markers, CAPS5-16, SCAR5-18, SCAR5-25 probably linked to the late maturity trait  
330 loci, were clustered on the 1st homologous chromosome, and belonged to another linkage group (Fig. 4).

331 Previous studies on the maturity QTL mapping showed that the genetic interval of maturity QTL was  
332 relatively large. The major QTL for maturity was mapped at 0–6 cM on chromosome 5 in diploid materials, and  
333 the genetic distance between two flanking markers was 6 cM (Visker et al. 2003). In tetraploid materials, the  
334 major QTL for maturity was also mapped at 14–22 cM on chromosome 5, and the genetic distance between two  
335 flanking markers was 8 cM (Hackett et al. 2014). In this study, based on simplified genome genetic segment  
336 mining and marker development, the QTL for the early maturity trait was mapped in a physical interval of 471  
337 kb, which greatly approached the early maturity trait loci and the average distance between two makers was 3.44  
338 cM. Bioinformatics analysis revealed that there were a total of 22 annotated genes in the 471kb region, and the  
339 E3 ubiquitin ligase PUB14 gene was most likely related to potato maturity. In *Arabidopsis*, this gene regulates  
340 flowering of *Arabidopsis thaliana* (Ma Da et al. 2014). Among the photoperiod, it regulated flowering pathways  
341 that currently have been discovered, a variety of components are E3 ubiquitin ligase target proteins and can be  
342 mediated by E3 ubiquitin ligase to achieve its ubiquitination degradation, thus affecting the photoperiod signals  
343 for flowering regulation and may affect photoreceptor stability, circadian clock function, and flowering regulator  
344 CO stability (Chen et al. 2011; Imaizumi et al. 2003; Takase et al. 2011; Ma Da, et al. 2014). Photoperiod has a  
345 great influence on potato plant growth, tuber formation, and development. Under long daylight, stems and  
346 leaves grow vigorously, a large number of stolons appear, but the tuber formation is delayed and the yield is  
347 decreased. Under short daylight, plant growth is normal, and the tuber production is faster. Assimilation  
348 products are transported to tubers faster, thus tuber yield is high. Early maturing varieties are sensitive to  
349 daylight, while late maturing varieties have to form tubers under short daylight conditions. Therefore, the signal  
350 transduction pathway of potato flowering and tuber formation may be similar to that of *Arabidopsis thaliana*  
351 flowering regulation. Thus, E3 ubiquitin ligase PUB14 may act as an intermediate mediator during potato  
352 flowering or tuber formation, regulating flowering and tuber formation. In addition, the auxin export vector gene  
353 may also be involved in potato maturity. Auxin participates in the regulation and control of many physiological  
354 and biochemical processes, such as root occurrence, photoreaction, apical dominance, flowers development,  
355 leaves and fruits shedding, and distribution of assimilation products. In the process of auxin transport, this  
356 protein, as a specific auxin output vector, can induce IAA passively flowing to the cell wall, then enter into next  
357 cell, thus forming polar transport. In the late growth and development of potato, this gene may be involved in  
358 assimilation product distribution as well as leaf and fruit shedding, thus plants show early maturation. However,  
359 whether these two genes are related to maturity needs further analysis and validation. In this study, we also  
360 examined the segregation of the maturity-related gene *StCDF1* (Kloosterman et al. 2013) in the population of  
361 this study, and the results showed that the late maturing parent Zhongshu 19 contained the gene *StCDF1.1* (late  
362 maturity related gene) and *StCDF1.2* (early maturity related gene), the early maturing parent Zhongshu 3 only  
363 contained *StCDF1.1*, both the parents do not contained *StCDF1.3* (early maturity related gene), and also there

364 was no polymorphism in our segregation population. Moreover, we also test the *StCDF1.2* gene in 83 Chinese  
365 varieties, and the result showed that only 4 out of 36 early maturity varieties and 5 out of 47 late maturity  
366 varieties contained the early maturity related gene *StCDF1.2* (data not shown). Moreover, the alignment of  
367 *StCDF1* with the reference genome showed that the *StCDF1* was located in 4.537-4.542Mb, but the maturity  
368 locus in our study is located in 3.7-4.2Mb. Pedigree investigation showed that the *StCDF1.2* gene was cloned  
369 from CE3130 that should originated from phureja (Kloosterman et al., 2013), the early maturity genes of  
370 Zhongshu 3 maybe come from cv. Katahdin. All the above indicated that there should exist other different  
371 maturity-related genes in our maturity segregation population of this study from the gene *StCDF1*.

372 The tetraploid mapping software TetraploidMap (Hackett et al. 2007) used in this study only can identify  
373 three marker types. For a single dominant marker, the parental genotype is AOOO × OOOO, and the segregation  
374 ratio of progeny is 1:1. For double dominant markers, the parental genotypes are AAOO × OOOO and AOOO ×  
375 AOOO, and the segregation ratios are 5:1 and 3:1. There are still two types of markers the software does not  
376 recognize, i.e. markers of parental genotypes AOOO × AAOO and AAOO × AAOO with the segregation ratios  
377 of 11:1 and 35:1. Therefore, among the 32 polymorphic markers selected from 152 SSR markers, four markers  
378 belonged to the 11:1 marker type, and the software did not recognize them. Therefore, only 28 polymorphic SSR  
379 markers could be used in the study to construct the map. Because the tetraploid mapping software limits the  
380 recognition of marker types, some markers are not available, and made the number of markers less than normal  
381 in the genetic map. Nevertheless, we have mapped the QTL for the early maturity trait in the physical region of  
382 471 kb and analyzed the genes within this interval. Which provides a solid foundation for the cloning of the  
383 major gene or genes that control the early maturity trait.

384

#### 385 **Acknowledgments**

386 This work was supported by National Key R&D Program of China (2017YFD0101905), the National Natural Science Fund of China  
387 (31561143006, 31771860), China Agriculture Research System (CARS-9).

#### 388 **Compliance with ethical standards**

389 **Conflict of interest** Authors declare that they do not have conflict of interest.

390

391

392

393

394

395

396

397

398

399

400

401

402

403

404

405

406

407 **References**

- 408 Asano K, Kobayashi A, Tsuda S, Nishinaka M, Tamiya S (2012) DNA marker-assisted evaluation of potato genotypes for potential  
409 resistance to potato cyst nematode pathotypes not yet invading into Japan. *Breed Sci*, 62: 142-150
- 410 Bakker E, Achenbach U, Bakker J, van Vliet J, Peleman J, Segers B, van der Heijden S, van der Linde P, Graveland R, Hutten R, van Eck  
411 H, Coppoolse E, van der Vossen E, Bakker J, Goverse A (2004) A high-resolution map of the H1 locus harbouring resistance to the  
412 potato cyst nematode *Globodera rostochiensis*. *Theor Appl Genet*, 109: 146–152
- 413 Bradshaw JE, Hackett CA, Pande B, Waugh R, Bryan GJ (2008) QTL mapping of yield, agronomic and quality traits in tetraploid potato  
414 (*Solanum tuberosum* subsp. *tuberosum*). *Theor Appl Genet*, 116: 193-211
- 415 Bradshaw JE, Pande B, Bryan GJ, Hackett CA, McLean K, Stewart HE, Waugh R (2004) Interval mapping of quantitative trait loci for  
416 resistance to late blight [*Phytophthora infestans* (Mont.) de Bary], height and maturity in a tetraploid population of potato (*Solanum*  
417 *tuberosum* subsp. *tuberosum*). *Genetics*, 168: 983-995.
- 418 Chen M, Chory J (2011) Phytochrome singling mechanisms and the control of plant development. *Trends Cell Biol*, 21: 664-671
- 419 Collins A, Milbourne D, Ramsay L, Meyer R, Chatot-Balandras C, Oberhagemann P, De Jong W, Gebhardt C, Bonnel E, Waugh R (1999)  
420 QTLs for field resistance to late blight in potato are strongly correlated with maturity and vigour. *Mol Breeding*, 5: 387-398
- 421 Danan S, Veyrieras JB, Lefebvre V (2011) Construction of a potato consensus map and QTL meta-analysis offer new insights into the  
422 genetic architecture of late blight resistance and plant maturity traits. *BMC Plant Biol*, 11: 1-16
- 423 Draffehn AM, Li L, Krezdorn N, Ding J, Lübeck J, Strahwald J, Muktar MS, Walkemeier B, Rotter B, Gebhardt C (2013) Comparative  
424 transcript profiling by SuperSAGE identifies novel candidate genes for controlling potato quantitative resistance to late blight not  
425 compromised by late maturity. *Front Plant Sci*, 4: 1-21
- 426 Ewing EE, Simko I, Smart CD, Bonierbale MW, Mizubuti ESG, May GD, Fry WE (2000) Genetic mapping from field tests of qualitative  
427 and quantitative resistance to *Phytophthora infestans* in a population derived from *Solanum tuberosum* and *Solanum berthaultii*. *Mol*  
428 *Breeding*, 6: 25-36
- 429 Feingold S, Lloyd J, Norero N, Bonierbale M, Lorenzen J (2005) Mapping and characterization of new EST derived microsatellites for  
430 potato (*Solanum tuberosum* L.). *Theor Appl Genet*, 111: 456-466
- 431 Ghislain M, Nunez J, Del Rosario Herrera M, Pignataro J, Guzman F, Bonierbale M, Spooner DM (2009) Robust and highly informative  
432 microsatellite-based genetic identity kit for potato. *Mol Breeding*, 23: 377-388
- 433 Hackett CA, Milne I, Bradshaw JE, Luo Z (2007) TetraploidMap for Windows: linkage map construction and QTL mapping in  
434 auto-tetraploid species. *J Hered*, 98: 727-729
- 435 Hackett CA, J Bradshaw JE, Bryan GJ (2014) QTL mapping in autotetraploids using SNP dosage information. *Theor Appl Genet*, 1-20
- 436 Hara-Skrzypiec, A., J. Sliwka, H. Jakuczun and E. Zimnoch-Guzowska (2018). QTL for tuber morphology traits in diploid potato. *J Appl*  
437 *Genet* 59(2): 123-132.
- 438 Imaizumi T, Tran HG, Swartz TE, Briggs WR, Kay SA (2003) FKF1 is essential for photoperiodic-specific light signaling in Arabidopsis.  
439 *Nature*, 426: 302-306
- 440 Jiao W, Fu X, Dou J, Li H, Su H, Mao J, Yu Q, Zhang L, Hu X, Huang X, Wang Y, Wang S, Bao Z (2014) High-resolution linkage and  
441 quantitative trait locus mapping aided by genome survey sequencing: building up an integrative genomic framework for a bivalve  
442 mollusc. *DNA Res*, 2014, 21: 85-101
- 443 Kloosterman B, Abelenda JA, Gomez Mdel M, Oortwijn M, de Boer JM, Kowitwanich K, Horvath BM, van Eck HJ, Smaczniak C, Prat  
444 S, Visser RG, Bachem CW. (2013) Naturally occurring allele diversity allows potato cultivation in northern latitudes. *Nature*, 495:  
445 246-250
- 446 Li XC, Li GC, Xu JF, Duan SG, Bian CS, Pang WF, Liu J, Jin LP (2017) Development and Verification of SCAR Marker Linked to Maturity  
447 in Tetraploid Potato. *ACTA AGRONOMICA SINICA*, 43(6): 853-860<sup>[1]</sup>
- 448 Ma D, Li W, Dai LY (2014) Regulation of E3 ubiquitin ligase in photoperiod dependent flowering. *Crop Res*, 28: 424-427
- 449 Manrique-Carpintero, N. C., J. J. Coombs, G. M. Pham, F. P. E. Laimbeer, G. T. Braz, J. Jiang, R. E. Veilleux, C. R. Buell and D. S. Douches  
450 (2018). Genome Reduction in Tetraploid Potato Reveals Genetic Load, Haplotype Variation, and Loci Associated With Agronomic  
451 Traits. *Front Plant Sci* 9: 944.
- 452 Oberhagemann P, Chatot-Balandras C, Schäfer-Pregl R, Wegener D, Palomino C, Salamini F, Bonnel E, Gebhardt CA (1999) Genetic  
453 analysis of quantitative resistance to late blight in potato: towards marker-assisted selection. *Mol Breeding*, 5: 399-415

- 454 Sliwka J, Jakuczun H, Lebecka R, Marczewski W, Gebhardt C, Zimnoch-Guzowska E (2007) Tagging QTLs for late blight resistance and  
455 plant maturity from diploid wild relatives in a cultivated potato (*Solanum tuberosum*) background. Theor Appl Genet, 115: 101-112
- 456 Simonsen KL and McIntyre LM (2004) Using alpha wisely: improving power to detect multiple QTL. Statistical Applications in Genetics  
457 and Molecular Biology Vol 3 Issue 1, Article 1.
- 458 Takase T, Nishiyama Y, Tanihigashi H, Ogura Y, Miyazaki Y, Yamada Y, Kiyosue T (2011) LOV KELCH PROTEIN2  
459 and ZEITLUPE repress Arabidopsis photoperiodic flowering under non-inductive conditions, dependent on FLAVIN-BINDING  
460 KELCH REPEAT F-BOX1. Plant J, 67: 608-621
- 461 Van Eck HJ (1995) Localisation of morphological traits on the genetic map of potato using RFLPs and isozyme markers. PhD thesis,  
462 Wageningen Agricultural University, Wageningen, The Netherlands.
- 463 Van Eck HJ, Rouppe van der Voort J, Draaistra J, Van Zandvoort P, Van Enckevort E, Segers B, Peleman J, Jacobsen E, Helder J, Bakker J  
464 (1995) The inheritance and chromosomal localization of AFLP markers in a non-inbred potato offspring. Mol Breeding, 1: 397-410
- 465 Visker MHPW, Keizer LCP, Van Eck HJ, Jacobsen E, Colon LT, Struik PC (2003) Can the QTL for late blight resistance on potato  
466 chromosome 5 be attributed to foliage maturity type? Theor Appl Genet, 106: 317-325
- 467 Wang S, Meyer E, McKay JK, Matz MV (2012) 2b-RAD: a simple and flexible method for genome-wide genotyping. Nat Methods, 9(8):  
468 808-810
- 469 Zhou J (2014) QTL mapping and genetic analysis of tuber formation in potato (*Solanum tuberosum* L.). Dissertation. Huazhong Agricultural  
470 University
- 471 Zhu WW, Xu JF, Li GC, Duan SG, Liu J, Bian CS, Pang WF, Walter De Jong, Jin LP (2015) Development and verification of a CAPS  
472 marker linked to tuber shape gene in potato. Acta Agronomica Sinica, 41(10): 1529 -1536

## **Table Captions**

**Table 1** Information of the 50 primers used in the genetic map

**Table 2** Basic analysis of sequencing data

**Table 3** Makers associated with physiological maturity KWSig: the significant of Kruskal-Wallis test.

AVSig: the significant of the analysis of variance. Mean (0):the mean when the maker is absent. Mean

(1): the mean when the maker is present. SED: the stand error of difference between the means.

**Table 4** Gene annotation and location in the physical interval

**Table S1** Phenotypic data 2014-2017

## Figure Captions

**Fig. 1** Maturity frequency distribution of the mapping population individuals. X-axis indicates maturity type of the mapping population, Y-axis indicates the ratio between individuals of different maturity types and the whole mapping population. The entire mapping population consists of 221 individuals.

**Fig. 2** Distribution of tags on the chromosome and tag density map. 0-80 M: chromosome physical distance (unit: M). Chr1-Chr12: 12 potato chromosomes, respectively. Right histogram: different colors indicate different tag numbers, and numbers indicate specific tag numbers. In each chromosome, the upper long histogram shows the tag density distribution on the chromosome, and the long histogram below shows the tag distribution on the chromosome.

**Fig. 3** Differential tag density map of early and late maturing mixed pool. 0-80 M: chromosome physical distance (unit: M). Chr1-Chr12: 12 potato chromosomes, respectively. In each chromosome, the upper long histogram shows the specific tag density of the early maturing pool, the middle long histogram shows the specific tag density of the late maturing pool, and the long histogram below shows the absolute value of differential tag density between the two pools. Right histogram, different colors indicate different tag numbers, and numbers indicate the specific tag numbers.

**Fig. 4** Genetic map of chromosome 5 in potato. The left side of the map is 50 molecular markers. The numbers on the right indicate the corresponding genetic distances (unit: cM). Overall: chromosome 5. C1-C4: represent four homologous chromosomes of chromosome 5, respectively.

**Fig. 5** QTL mapping for Maturity. Line shows LOD values over the chromosome 5. The horizontal line indicates the confidence threshold (LOD value =2.97).

**Fig. 6** Physical interval of the early maturity QTL on chromosome 5. The left side is genetic linkage map of 3<sup>rd</sup> homologous chromosome 5, and the right one is corresponding physical map.



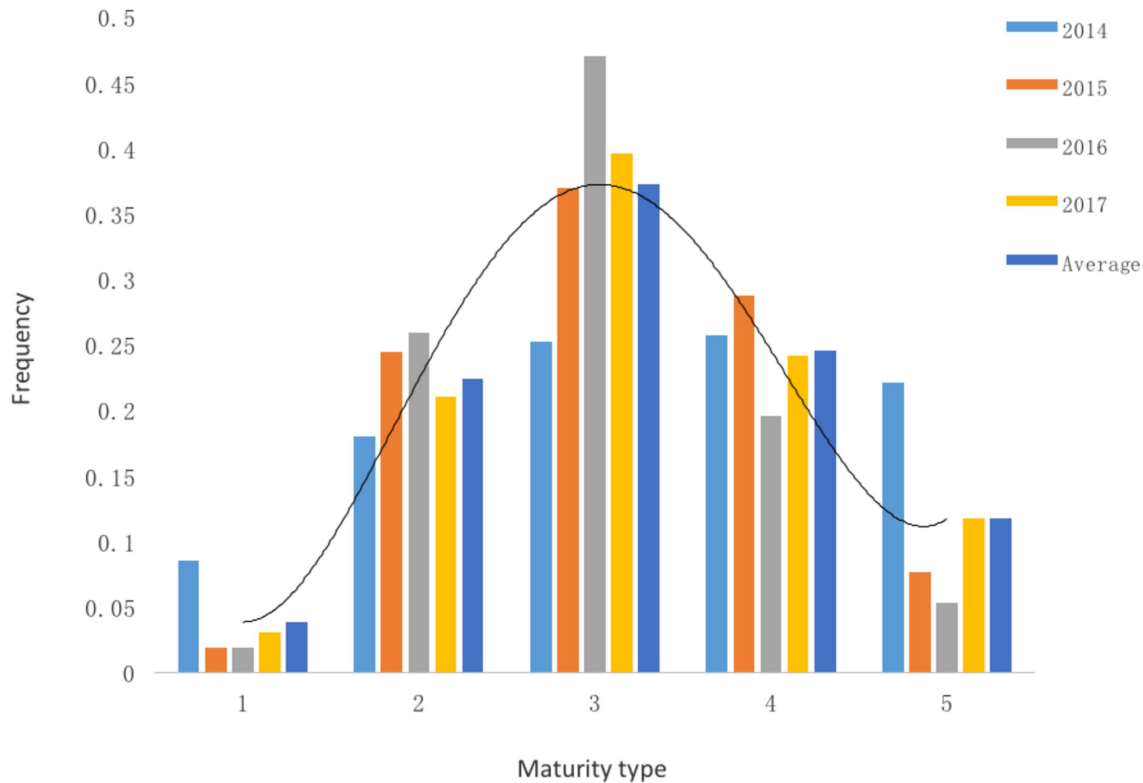

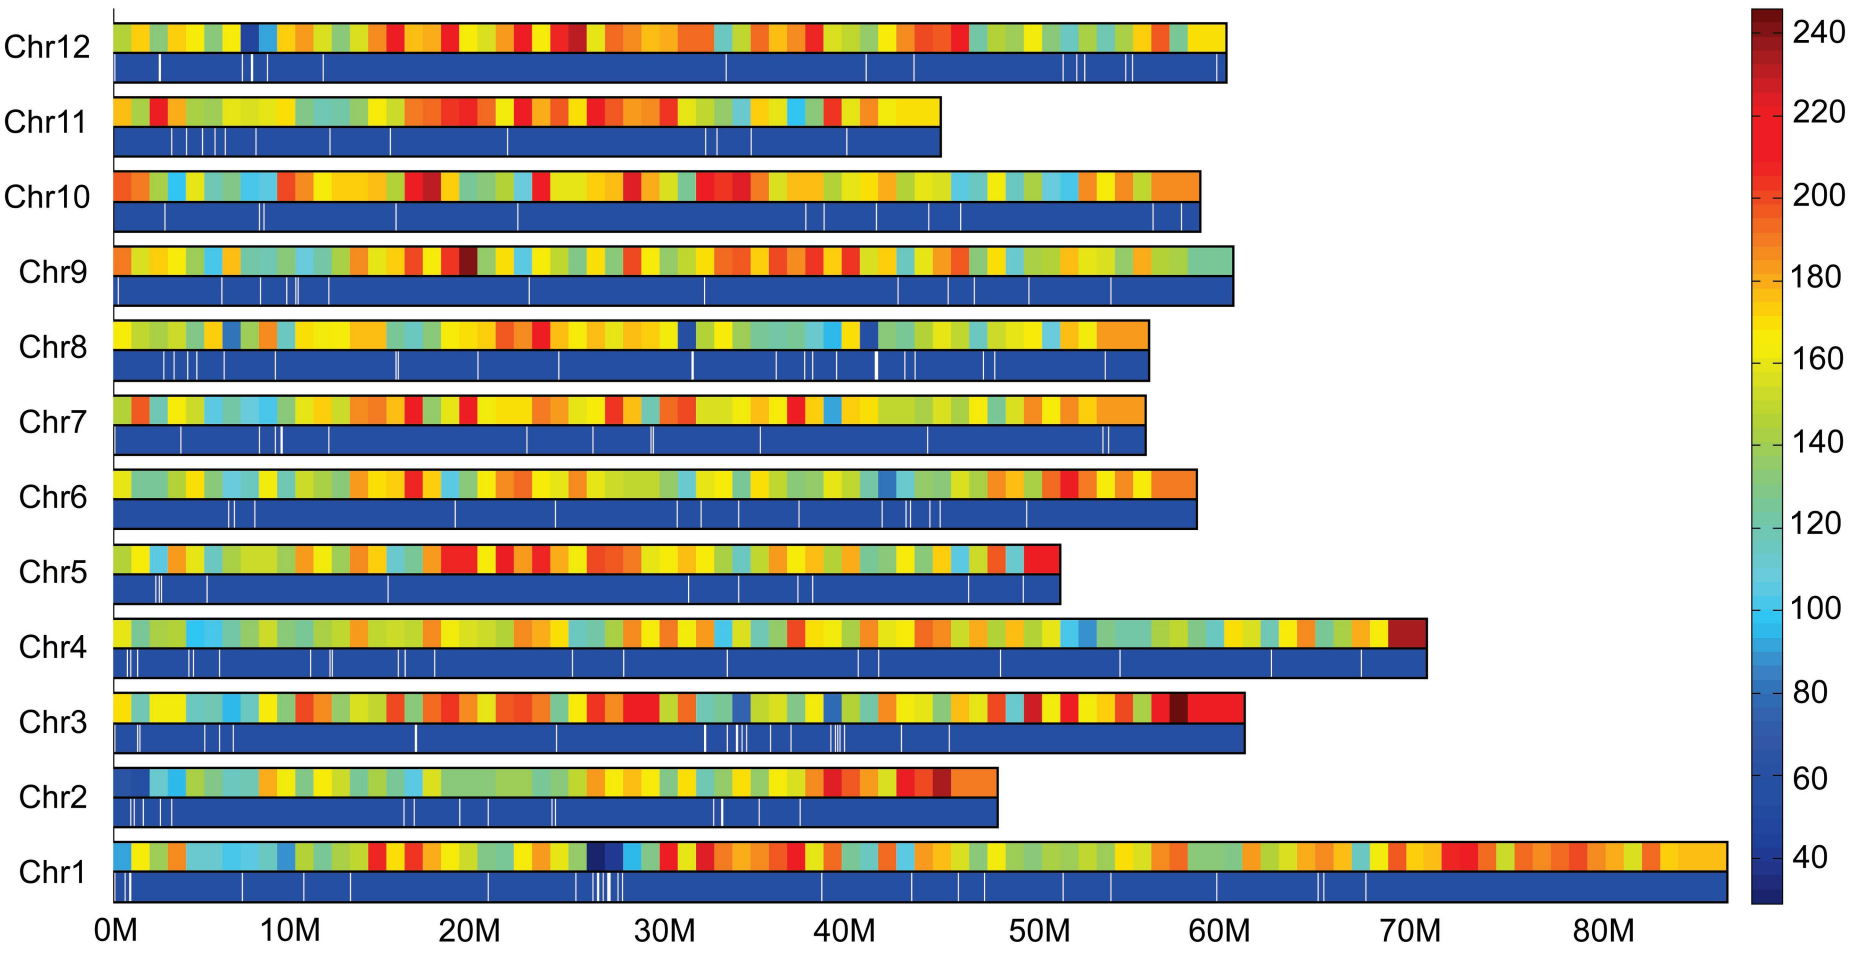

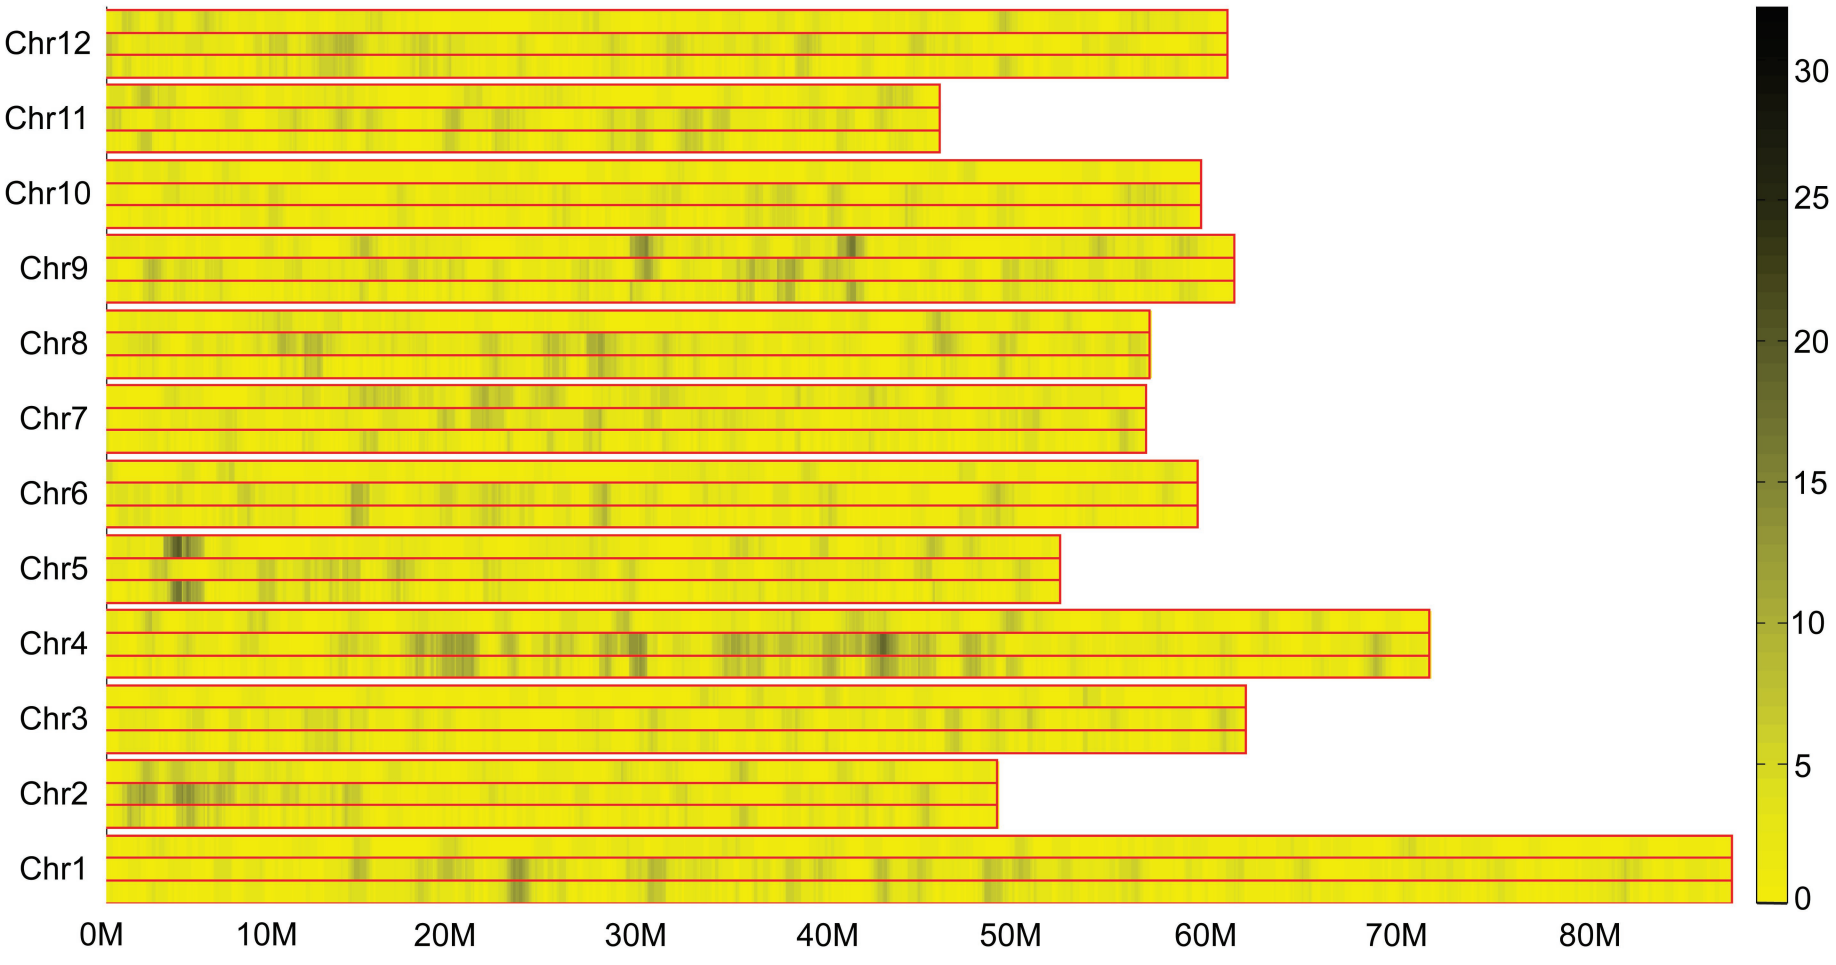

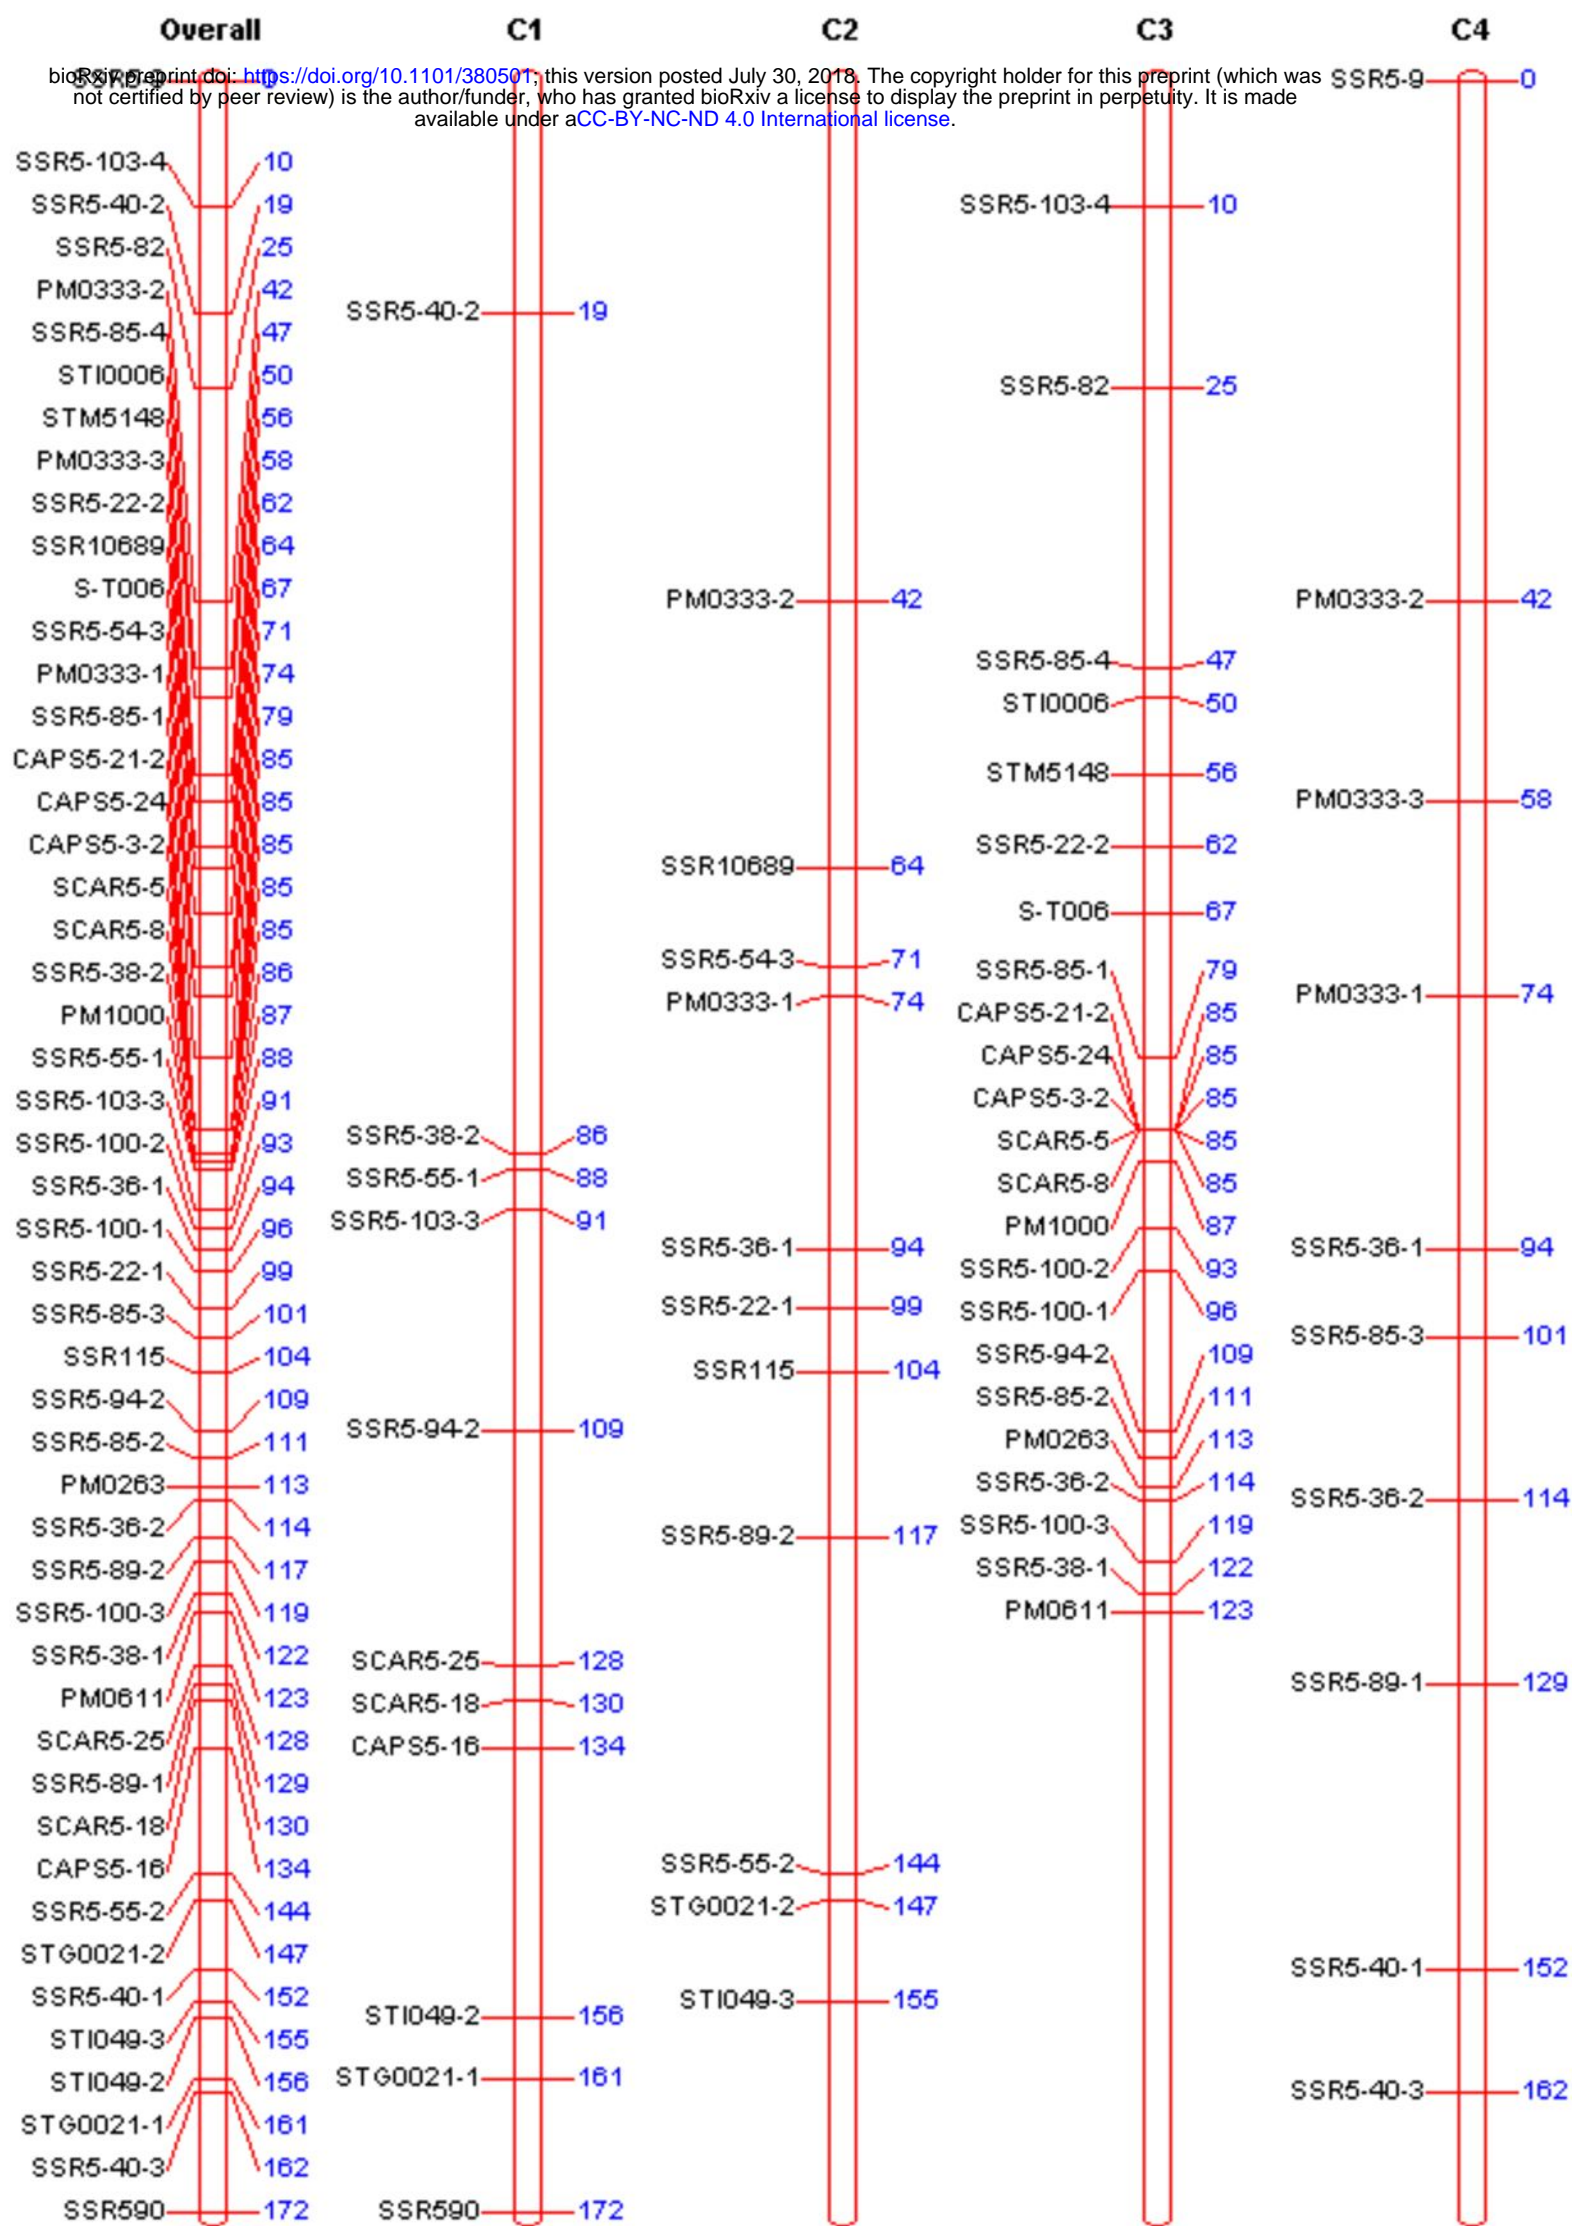

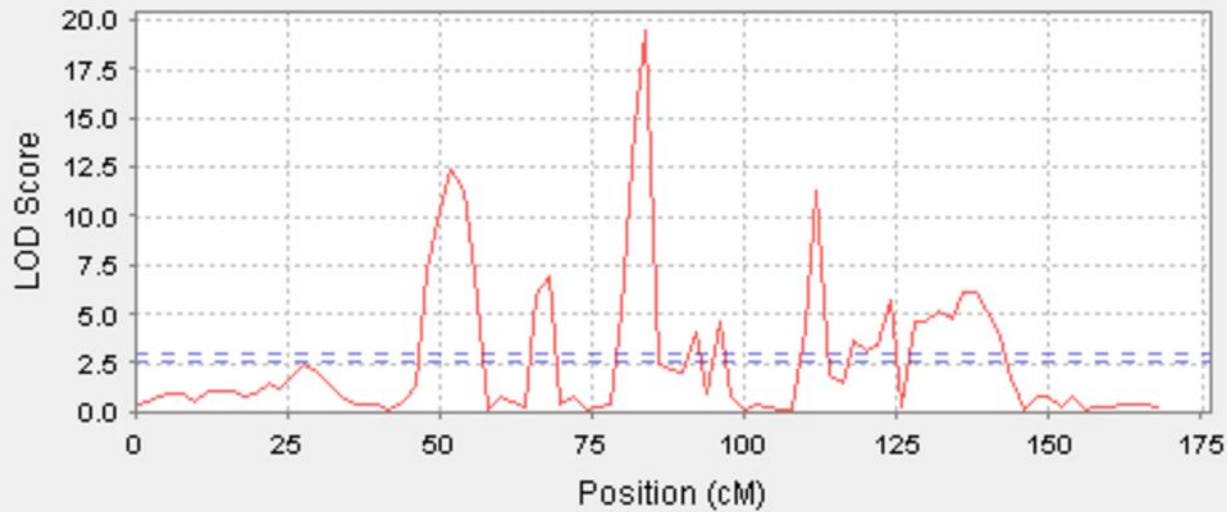

C3

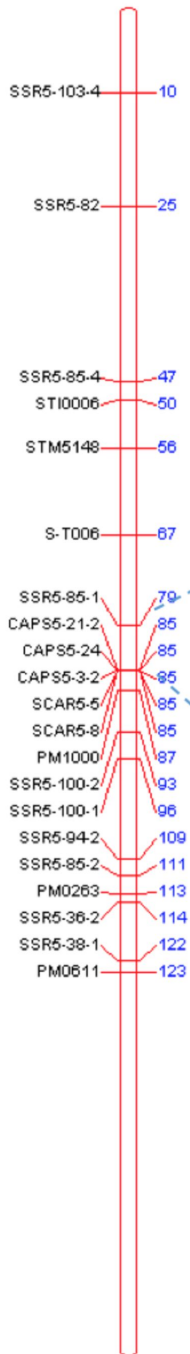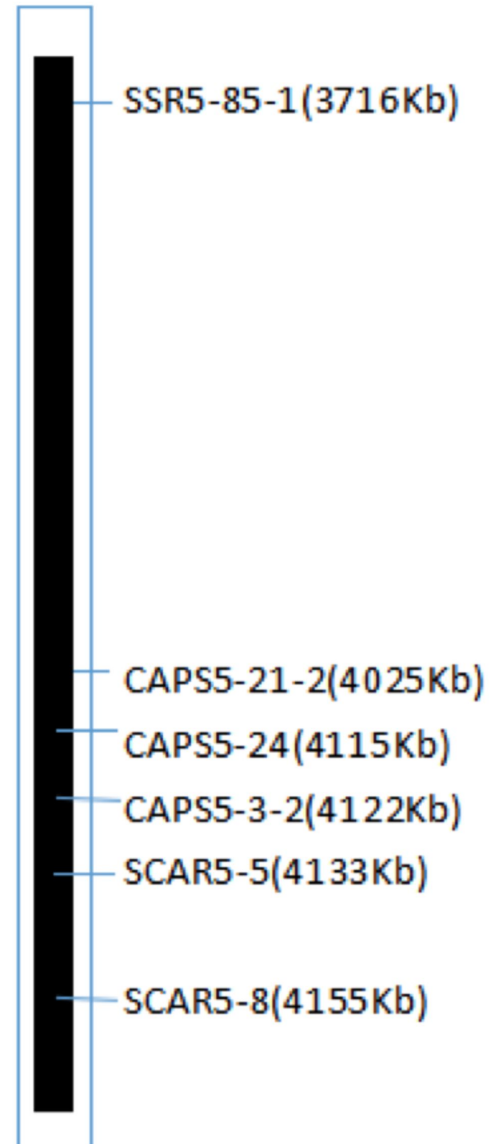

**Table4. Gene annota**

| Start position | Terminal position | Gene                 |
|----------------|-------------------|----------------------|
| 3794799        | 3797561           | PGSC0003DMG400030514 |
| 3800502        | 3803746           | PGSC0003DMG400030561 |
| 3804570        | 3804947           | PGSC0003DMG400042076 |
| 3808243        | 3812259           | PGSC0003DMG400030560 |
| 3812966        | 3817781           | PGSC0003DMG400030559 |
| 3819129        | 3825291           | PGSC0003DMG400030513 |
| 3826477        | 3835460           | PGSC0003DMG400030558 |
| 3846875        | 3847435           | PGSC0003DMG400035916 |
| 3855942        | 3861025           | PGSC0003DMG40003051  |
| 3872716        | 3876866           | PGSC0003DMG400030557 |
| 3897559        | 3898635           | PGSC0003DMG400030556 |
| 3903471        | 3909624           | PGSC0003DMG400030510 |
| 3927363        | 3930287           | PGSC0003DMG400030509 |
| 3943033        | 3943669           | PGSC0003DMG400030508 |
| 3945081        | 3955925           | PGSC0003DMG400030507 |
| 3960120        | 3964565           | PGSC0003DMG400030555 |
| 3966729        | 3968667           | PGSC0003DMG400030554 |
| 3969058        | 3970107           | PGSC0003DMG400030506 |
| 3975677        | 3980357           | PGSC0003DMG400030553 |
| 3991348        | 3993998           | PGSC0003DMG400030552 |
| 4009033        | 4012803           | PGSC0003DMG400030551 |
| 4016212        | 4017445           | PGSC0003DMG400030505 |
| 4025454        | 4033006           | PGSC0003DMG400030550 |
| 4033954        | 4042260           | PGSC0003DMG400030549 |
| 4046634        | 4053740           | PGSC0003DMG400030548 |
| 4055474        | 4059978           | PGSC0003DMG400030547 |
| 4062234        | 4063922           | PGSC0003DMG400030504 |
| 4068242        | 4070295           | PGSC0003DMG400030503 |
| 4083569        | 4086820           | PGSC0003DMG400030546 |
| 4088794        | 4097482           | PGSC0003DMG400030502 |
| 4097590        | 4098620           | PGSC0003DMG400030582 |
| 4107529        | 4113266           | PGSC0003DMG400030544 |
| 4111951        | 4118400           | PGSC0003DMG400030501 |
| 4169120        | 4173221           | PGSC0003DMG400030543 |

**tion and location in the physical interval**

---

Gene function

---

Histone chaperone ASF1A  
HB06p  
Gene of unknown function  
ATP synthase subunit beta  
Fruit protein PKIWI502  
Sarcoplasmic reticulum histidine-rich calcium-binding protein  
ALG2-interacting protein X  
Conserved gene of unknown function  
1Repressor of RNA polymerase III transcription MAF1  
Membrane associated ring finger 1,8  
Gene of unknown function  
Conserved gene of unknown function  
Ribose-5-phosphate isomerase  
By genscan and genefinder  
Abc transporter  
Acetylglucosaminyl transferase  
Pentatricopeptide repeat protein  
FLA20  
ATP binding  
Chloroplast-targeted copper chaperone  
Spore coat protein  
Conserved gene of unknown function  
Conserved gene of unknown function  
Conserved gene of unknown function  
Myb-like transcription factor 6  
E3 ubiquitin ligase PUB14  
Conserved gene of unknown function  
Conserved gene of unknown function  
Conserved gene of unknown function  
Fyve finger-containing phosphoinositide kinase, fyv1  
Gene of unknown function  
WD-repeat protein  
Quinolate phosphoribosyl transferase  
Gene of unknown function

---
